# Supplementary material for: Quercetin in Tartary Buckwheat Induces Autophagy against Protein Aggregations
Source: MDPI journal article supplement (doi:10.3390/antiox10081217), 2021-07-29
Supplement: s1 [file s1]

## Supplementary figure 1

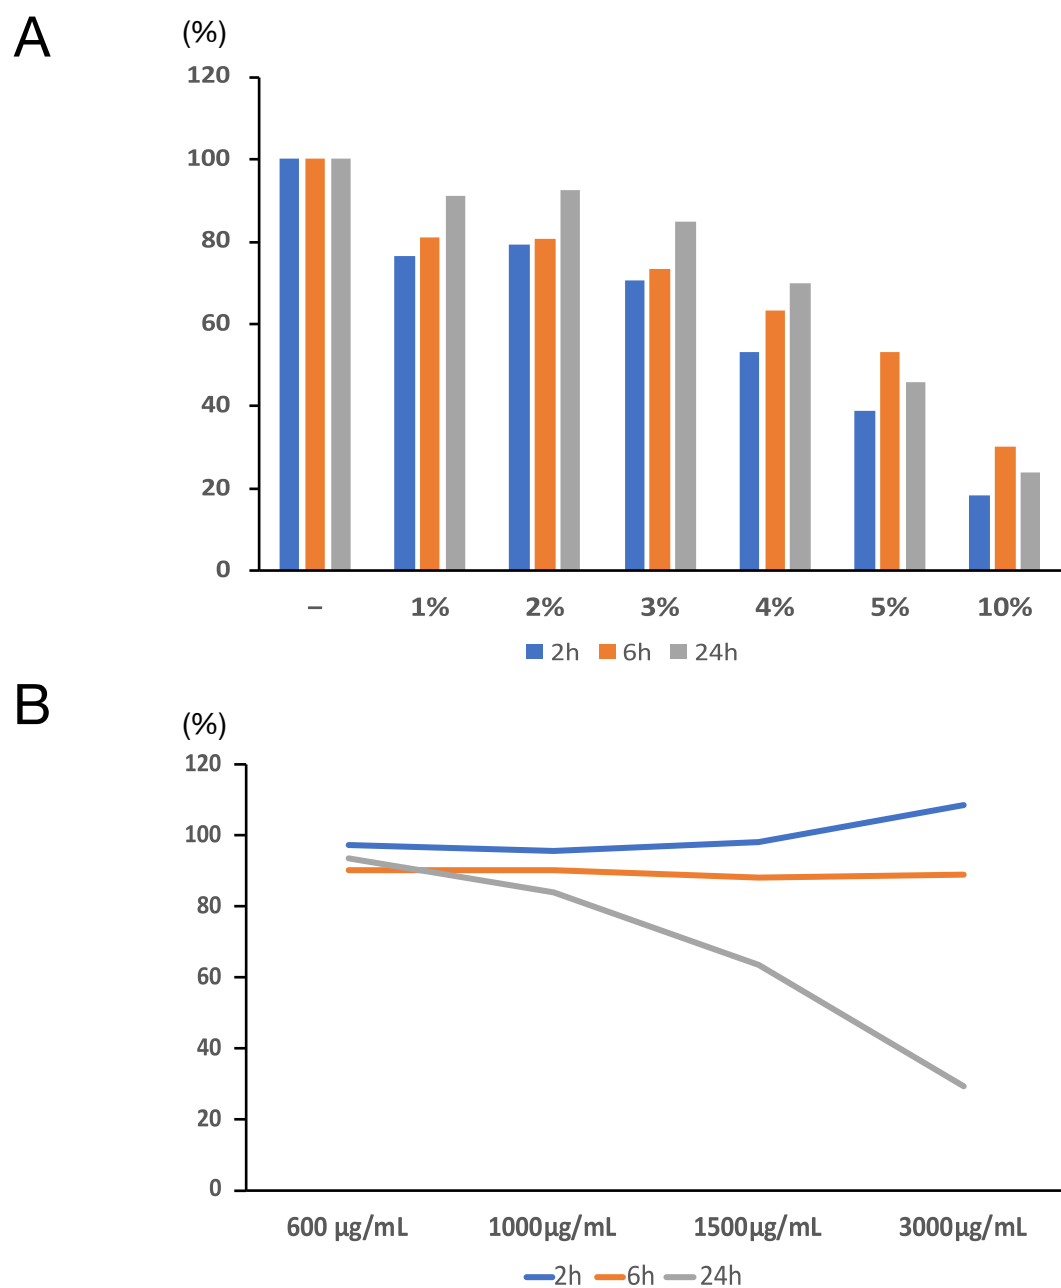

**Supplementary Fig 1. The effects of ethanol and TBE on cell viability.** (A) HeLa cells were treated with ethanol at 0 (-), 1, 2, 3, 4, 5, and 10% (v/v) for the indicated periods, and MTT assays were performed. Relative survival rates compared to 0% are presented. (B) HeLa cells were treated with TBE at final concentrations of 600, 1000, 1500, and 3000 µg/mL for the indicated periods under nutrient-rich conditions, and MTT assays were performed. Relative survival rates compared to time 0 (Control) are presented.
